# Supplementary material for: Structural evolution of Ag/BN hybrids via a polyol-assisted fabrication process and their catalytic activity in CO oxidation
Source: Royal Society of Chemistry journal article supplement (doi:10.1039/c9cy01464k), 2019-01-01
Supplement: c9cy01464k2.pdf [file c9cy01464k2.pdf]

## Appendix A. Supplementary data

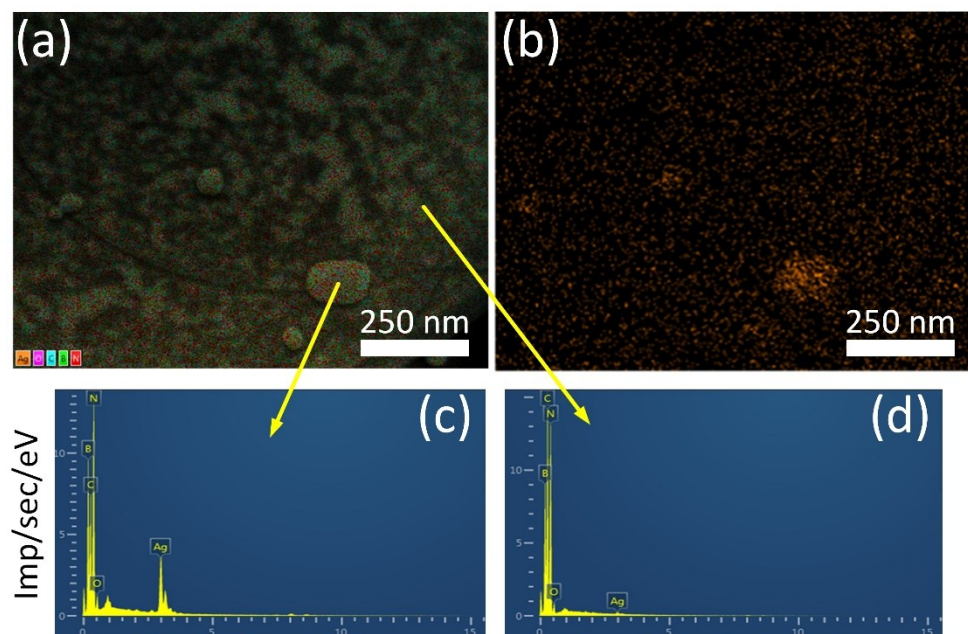

**Fig. S1.** EDX analysis of the M3\_30 sample: electron image with overlaid elemental maps (a), elemental map for Ag (b), and energy spectra (c, d).

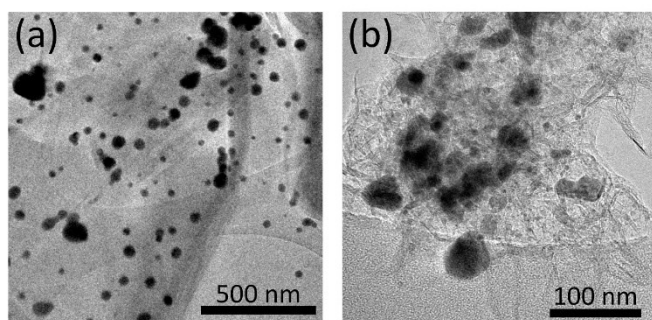

**Fig. S2.** TEM images of (a) M3\_24h and (b) S3\_24h samples.

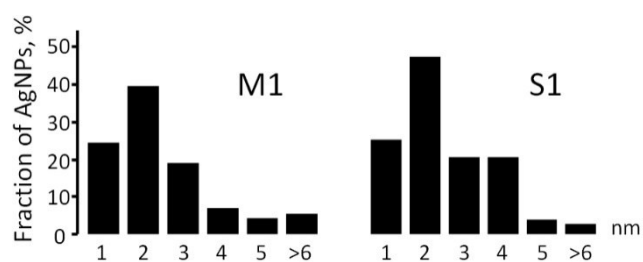

**Fig. S3.** AgNPs sizes distribution.

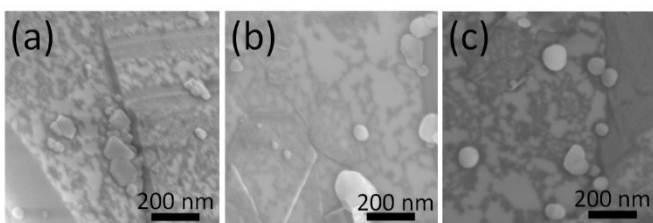

**Fig. S4.** SEM images of (a) M3\_30min, (b) M3\_6h, and (c) M3\_24h samples.

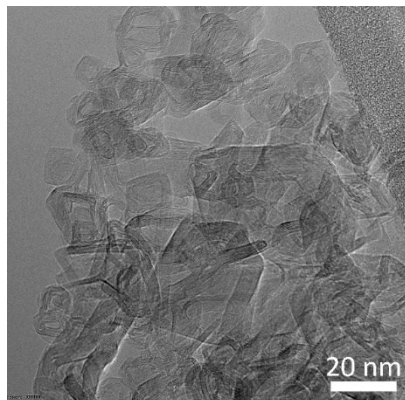

**Fig. S5.** TEM image of initial BNNPs.
