# Supplementary figures and images for: Structural evolution of Ag/BN hybrids via a polyol-assisted fabrication process and their catalytic activity in CO oxidation
Source: Royal Society of Chemistry journal article supplement (doi:10.1039/c9cy01464k), 2019-01-01

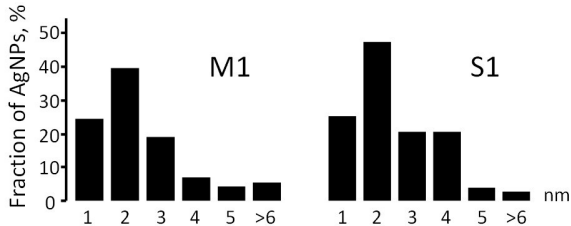

Supplement: c9cy01464k5.pdf [file c9cy01464k5.pdf]

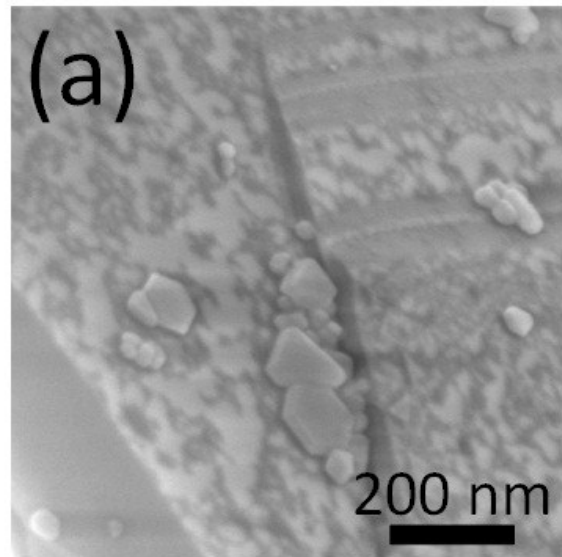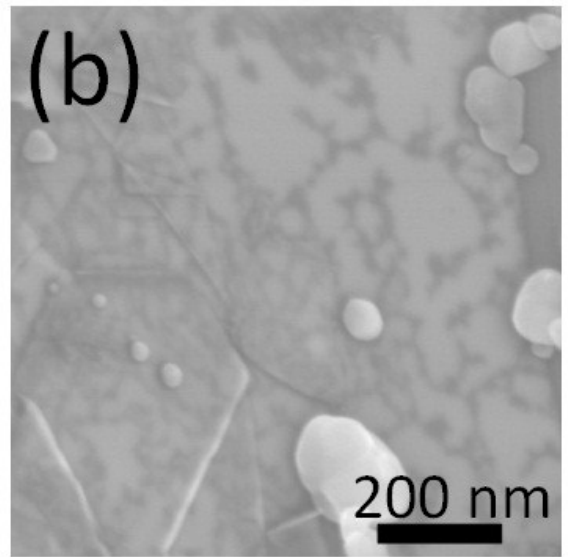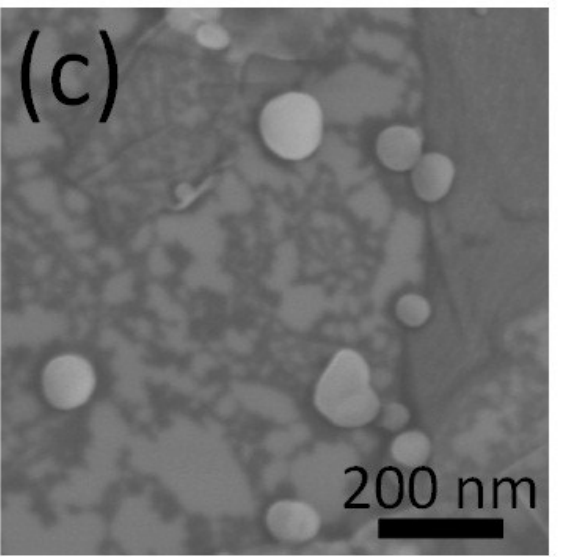

Supplement: c9cy01464k6.pdf [file c9cy01464k6.pdf]
